# Supplementary material for: Animal Models and Integrated Nested Laplace Approximations
Source: PubMed Central journal article supplement (PMC3737164; doi:10.1534/g3.113.006700), 2013-08-01
Supplement: supp_g3.113.006700_FigureS1.pdf [file supp_g3.113.006700_FigureS1.pdf]

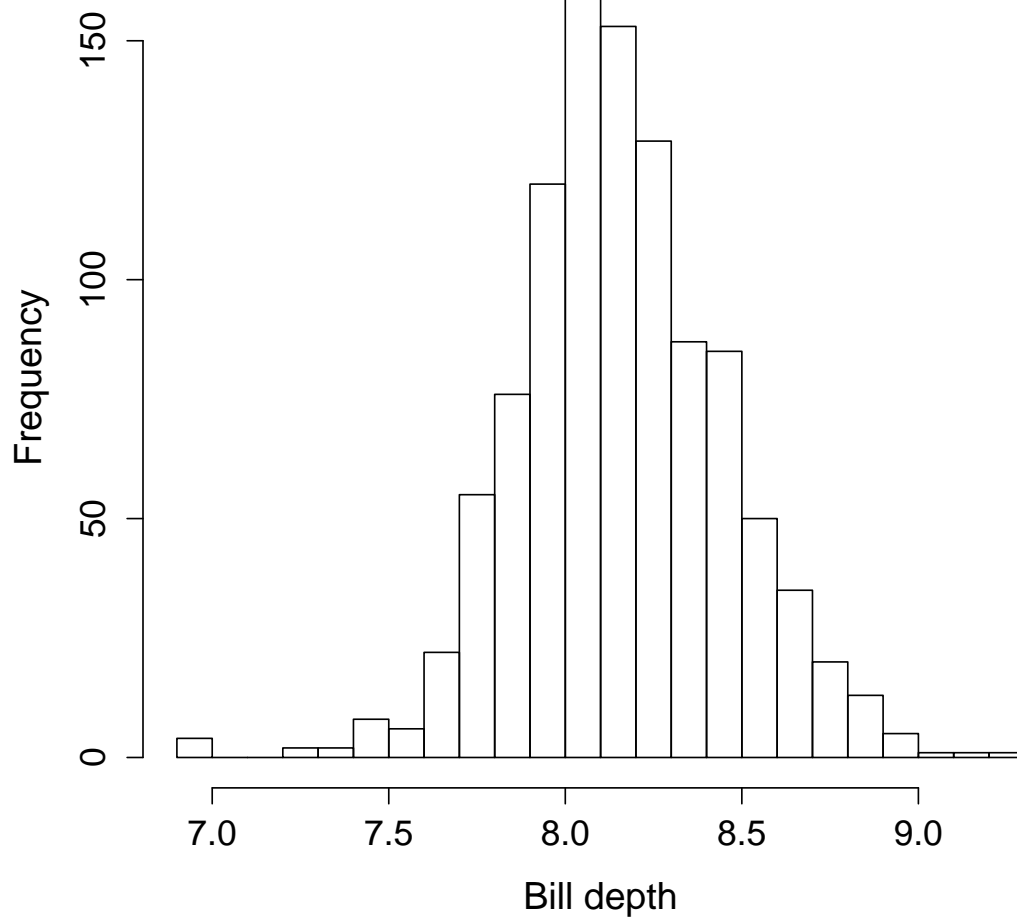

**Figure S1** Histogram showing phenotypic bill depth observations for house sparrows in northern Norway, indicating a Gaussian distribution.
