# Supplementary material for: Animal Models and Integrated Nested Laplace Approximations
Source: PubMed Central journal article supplement (PMC3737164; doi:10.1534/g3.113.006700), 2013-08-01
Supplement: supp_g3.113.006700_FigureS2.pdf [file supp_g3.113.006700_FigureS2.pdf]

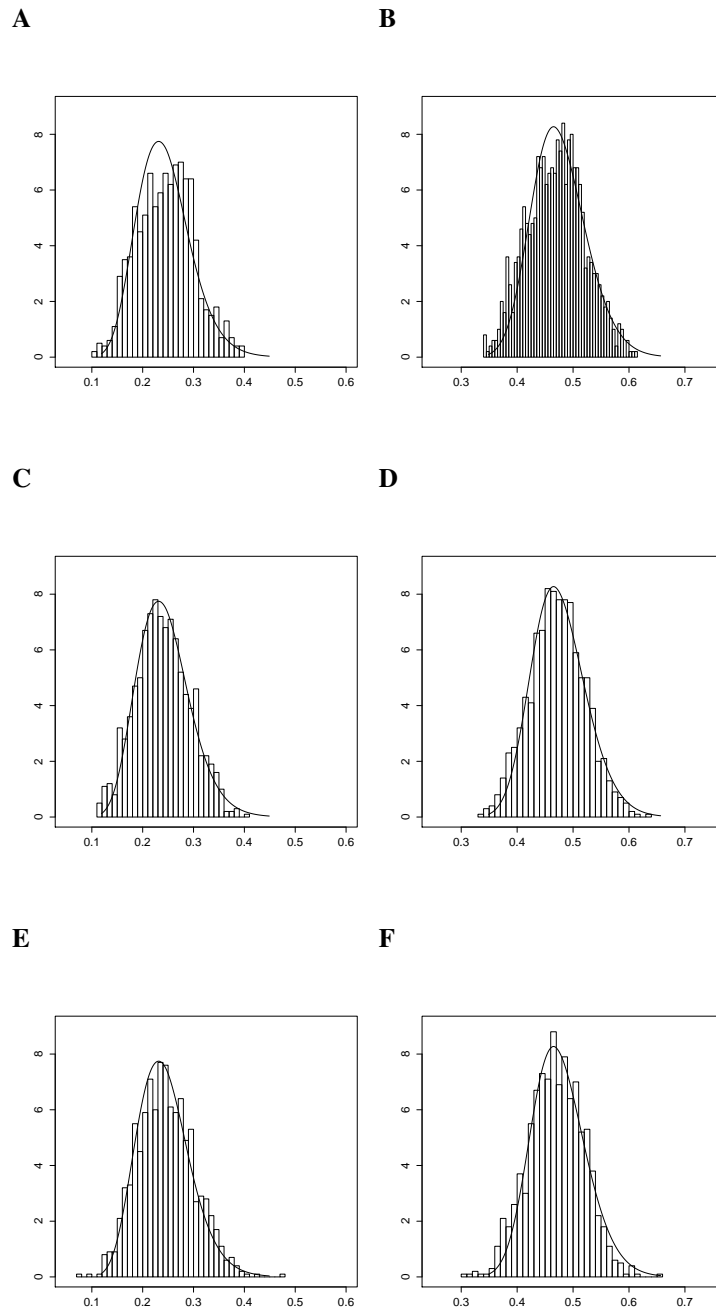

**Figure S2** Comparison of INLA and MCMC. INLA (solid line) and MCMC estimates (histogram) for different number of iterations for MCMC for the posterior marginal of  $\sigma_u^2$  and  $\sigma_e^2$  for the bill depth of house sparrows in northern Norway: 10000 iterations **(A)**  $\sigma_u^2$  and **(B)**  $\sigma_e^2$ , 100000 iterations **(C)**  $\sigma_u^2$  and **(D)**  $\sigma_e^2$ , 200000 iterations **(E)**  $\sigma_u^2$  and **(F)**  $\sigma_e^2$ . INLA used 7 seconds and MCMC used 51 seconds, 8.4 minutes and 17 minutes, respectively.
