# Supplementary material for: Animal Models and Integrated Nested Laplace Approximations
Source: PubMed Central journal article supplement (PMC3737164; doi:10.1534/g3.113.006700), 2013-08-01
Supplement: supp_g3.113.006700_FigureS4.pdf [file supp_g3.113.006700_FigureS4.pdf]

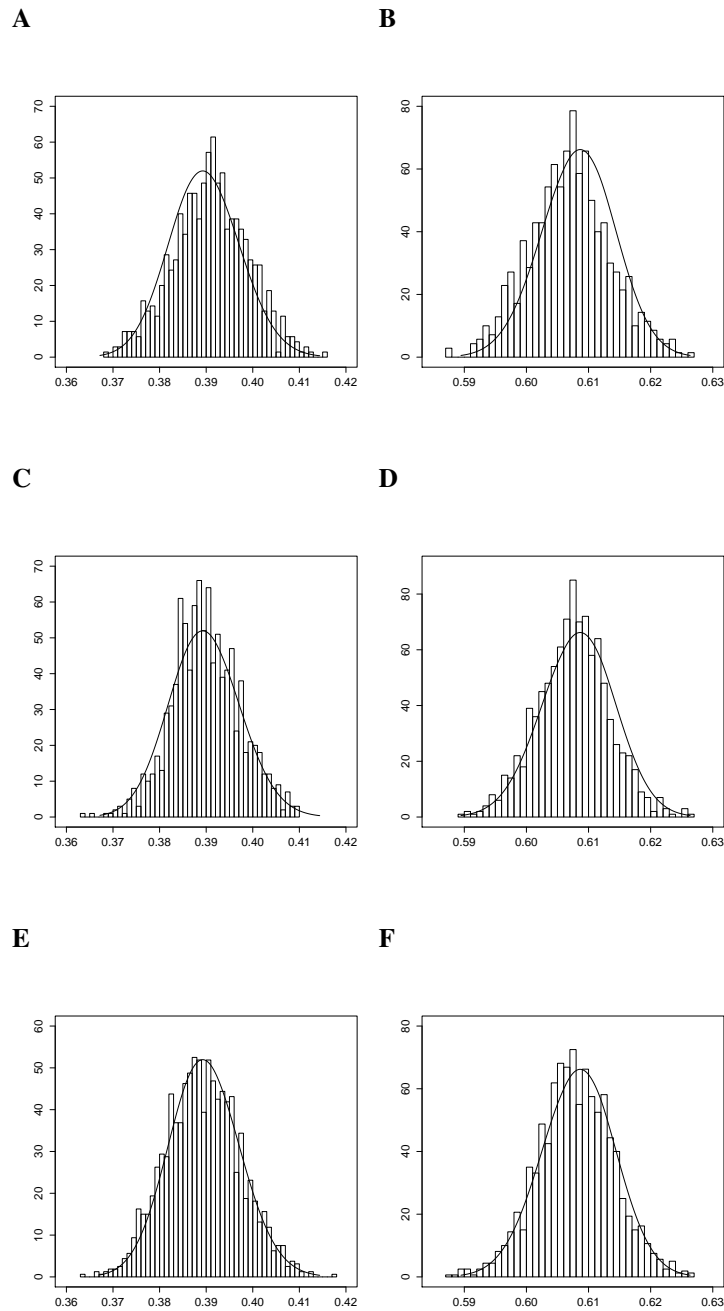

**Figure S4** Comparison of INLA and MCMC. INLA (solid line) and MCMC estimates (histogram) for different number of iterations for MCMC for the posterior marginal of  $\sigma_u^2$  and  $\sigma_e^2$  for a large synthetic pedigree and simulated dataset of  $n_p = 100072$  individuals: 10000 iterations (**A**)  $\sigma_u^2$  and (**B**)  $\sigma_e^2$ , 100000 iterations (**C**)  $\sigma_u^2$  and (**D**)  $\sigma_e^2$ , 500000 iterations (**E**)  $\sigma_u^2$  and (**F**)  $\sigma_e^2$ . INLA used 7.4 minutes and MCMC used 29 minutes, 3.6 hours and 17.9 hours, respectively.
