# Supplementary material for: Animal Models and Integrated Nested Laplace Approximations
Source: PubMed Central journal article supplement (PMC3737164; doi:10.1534/g3.113.006700), 2013-08-01
Supplement: supp_g3.113.006700_FigureS5.pdf [file supp_g3.113.006700_FigureS5.pdf]

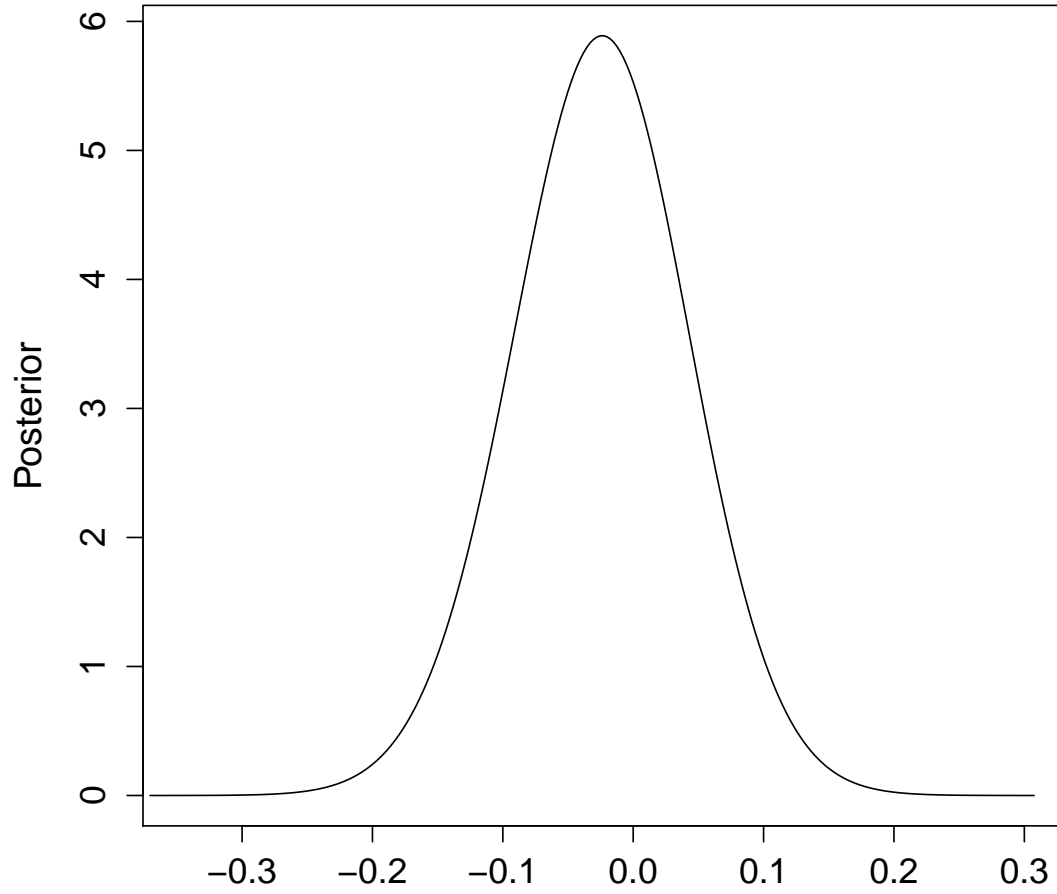

**Figure S5** Posterior of difference in mean breeding values for bill depth between cohorts 1993 and 2002 in house sparrows in northern Norway.
