# Supplementary material for: Animal Models and Integrated Nested Laplace Approximations
Source: PubMed Central journal article supplement (PMC3737164; doi:10.1534/g3.113.006700), 2013-08-01
Supplement: supp_g3.113.006700_TableS1.pdf [file supp_g3.113.006700_TableS1.pdf]

**Table S1 Inference from INLA for synthetic Poisson data.** Simulated under model  $\mathbf{y}_i \mid \lambda_i \sim \text{Pois}(\mathbf{n}_i, \lambda_i)$ ,  $\eta_i = \log(\lambda_i) = \beta_0 + \mathbf{u}_i$ , with  $\beta_0 = \mathbf{0}$ , levels of  $\sigma_u^2$  ranging from 0 to 1, and missing pattern similar to the house sparrow Poisson case study.  $\hat{\sigma}_u^2$  is the posterior mean additive genetic variance with standard deviations (sd), and 95% credible interval (CI).

| $\sigma_u^2$ | $\hat{\sigma}_u^2$ (sd) | 95% CI       |
|--------------|-------------------------|--------------|
| <b>0</b>     | 0.08 (0.02)             | (0.05,0.13)  |
| <b>0.05</b>  | 0.09 (0.02)             | (0.05,0.13)  |
| <b>0.1</b>   | 0.12 (0.03)             | (0.07,0.18)  |
| <b>0.15</b>  | 0.14 (0.03)             | (0.09,0.21)  |
| <b>0.2</b>   | 0.20 (0.04)             | (0.13,0.27)  |
| <b>0.3</b>   | 0.33 (0.05)             | (0.25,0.43)  |
| <b>0.4</b>   | 0.43 (0.05)             | (0.33,0.54)  |
| <b>0.5</b>   | 0.53 (0.06)             | (0.43,0.65)  |
| <b>0.6</b>   | 0.60 (0.06)             | (0.49,0.73)  |
| <b>0.7</b>   | 0.68 (0.06)             | (0.56,0.81)  |
| <b>0.8</b>   | 0.84 (0.08)             | (0.69,1.00)  |
| <b>0.9</b>   | 0.91 (0.08)             | (0.77, 1.08) |
| <b>1</b>     | 0.99 (0.09)             | (0.83,1.17)  |
